# Supplementary material for: An ultrathin SiO2 blocking layer to suppress interfacial recombination for efficient Sb2S3-sensitized solar cells
Source: Royal Society of Chemistry journal article supplement (doi:10.1039/c8qi00076j), 2018-01-01
Supplement: c8qi00076j1.pdf [file c8qi00076j1.pdf]

## Electronic Supplementary Information

### Ultrathin SiO<sub>2</sub> blocking layer to suppress interfacial recombination for efficient Sb<sub>2</sub>S<sub>3</sub>-sensitized solar cells

Yafeng Xu,<sup>ab</sup> Wenyong Chen,<sup>ab</sup> Xihong Ding,<sup>d</sup> Xu Pan,<sup>a</sup> Linhua Hu,<sup>a</sup> Shangfeng Yang,<sup>b</sup> Jun Zhu,<sup>\*ac</sup> and Songyuan Dai<sup>\*d</sup>

<sup>a</sup>Key Laboratory of Photovoltaic and Energy Conservation Materials, Institute of Applied Technology, Hefei Institutes of Physical Science, Chinese Academy of Sciences, Hefei 230031, China

<sup>b</sup>Hefei National Laboratory for Physical Sciences at Microscale, Key Laboratory of Materials for Energy Conversion, Chinese Academy of Sciences, Department of Materials Science and Engineering, Synergetic Innovation Center of Quantum Information & Quantum Physics, University of Science and Technology of China, Hefei 230026, China

<sup>c</sup>National Engineering Lab of Special Display Technology, State Key Lab of Advanced Display Technology, Academy of Opto-Electronic Technology, Anhui Provincial Key Laboratory of Advanced Functional Materials and Devices, Hefei University of Technology, Hefei 230009, China

<sup>d</sup>Beijing Key Laboratory of Novel Thin Film Solar Cells, North China Electric Power University, Beijing 102206, China

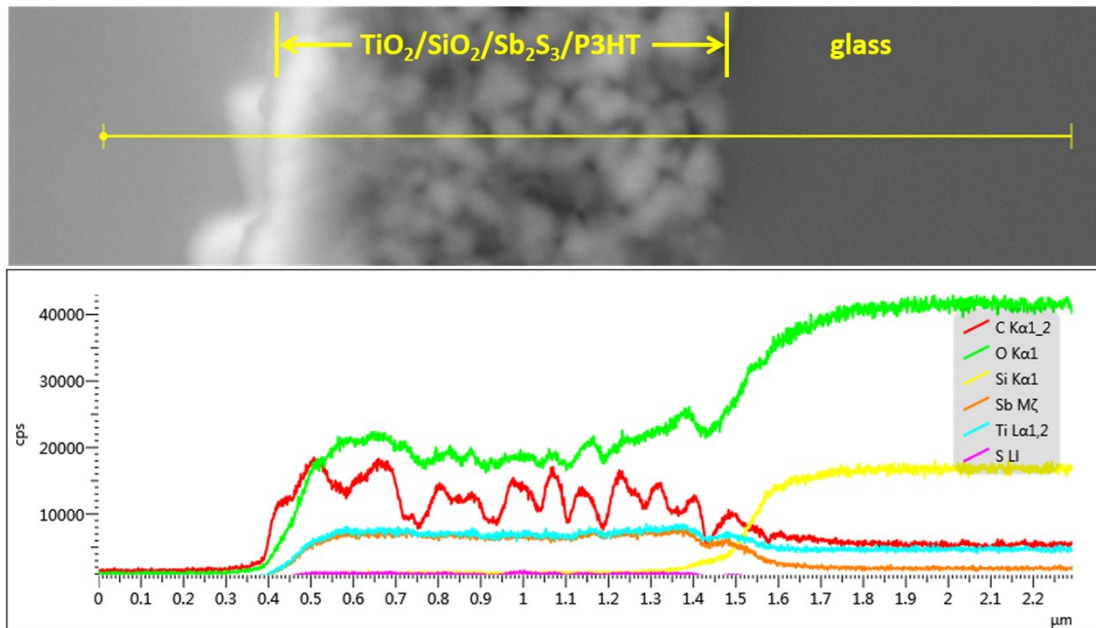

**Fig. S1** Cross-sectional SEM image and energy dispersive X-ray spectroscopy (EDS) line scan of  $\text{TiO}_2/\text{SiO}_2/\text{Sb}_2\text{S}_3/\text{P3HT}$  film deposited on glass. Glass was used instead of FTO coated glass to avoid the misinterpretation between Sb in  $\text{Sb}_2\text{S}_3$  and Sn in FTO.

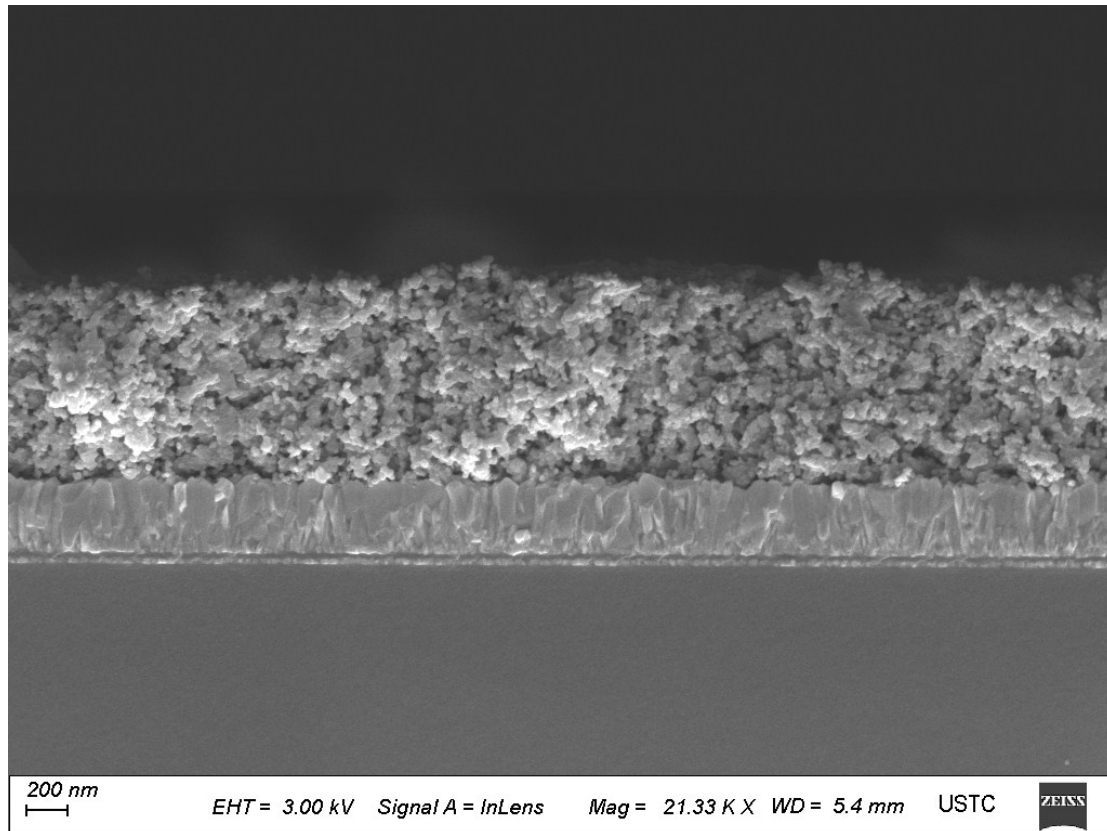

**Fig. S2** Cross-sectional SEM image of the  $\text{TiO}_2/\text{SiO}_2/\text{crystalline Sb}_2\text{S}_3$  mesoporous

film.

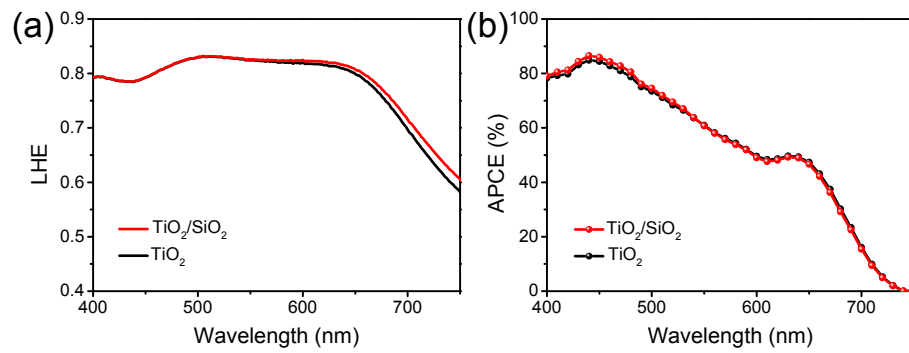

**Fig. S3** (a) LHE and (b) APCE spectra of the  $\text{Sb}_2\text{S}_3$ -sensitized solar cells based on  $\text{TiO}_2$  and  $\text{TiO}_2/\text{SiO}_2$  mesoporous films.

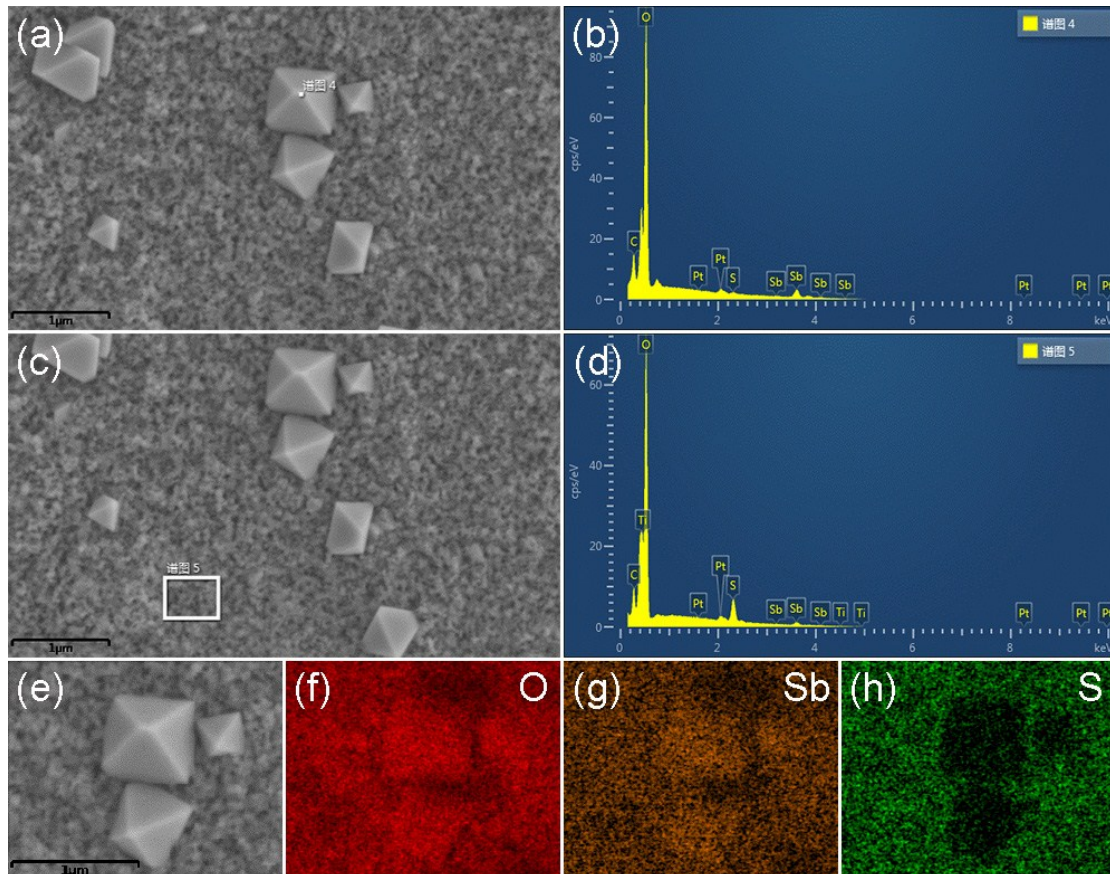

**Fig. S4** SEM images of (a), (c)  $\text{Sb}_2\text{S}_3$ -sensitized  $\text{TiO}_2$  mesoporous films with octahedral particles on the surface, typical EDS spectra of (b) a octahedral particle and (d)  $\text{Sb}_2\text{S}_3$ -sensitized  $\text{TiO}_2$  films, SEM image of (e) octahedral particles, oxygen (f), antimony (g) and sulphur (h) EDS element mapping images of the octahedral particles.

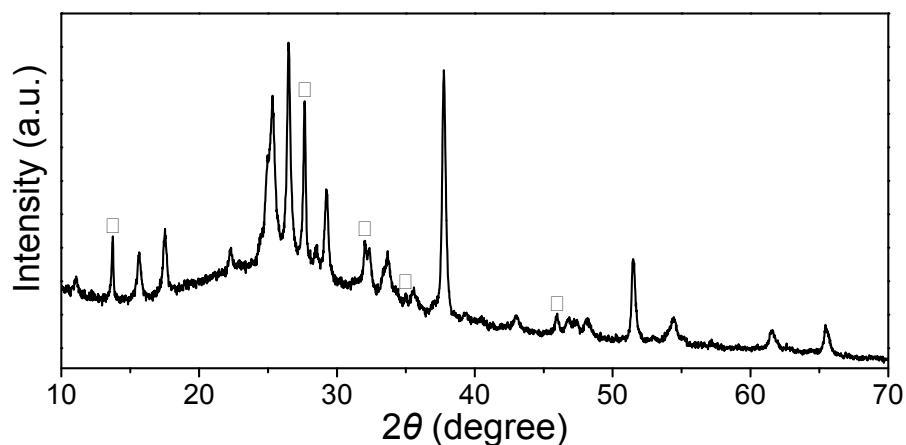

**Fig. S5** X-ray diffraction pattern of a typical  $\text{Sb}_2\text{S}_3$ -sensitized  $\text{TiO}_2$  film. The stars mark the peaks indexed to  $\text{Sb}_2\text{O}_3$  (JCPDS 43-1071).

**Table S1** Photovoltaic performances of  $\text{Sb}_2\text{S}_3$ -sensitized solar cells with  $\text{SiO}_2$  layer deposited on  $\text{Sb}_2\text{S}_3$  absorber.

|                                                               | $V_{\text{OC}}$ (V) | $J_{\text{SC}}$ (mA/cm <sup>2</sup> ) | FF (%) | Efficiency (%) |
|---------------------------------------------------------------|---------------------|---------------------------------------|--------|----------------|
| $\text{TiO}_2/\text{Sb}_2\text{S}_3/\text{P3HT}$              | 0.523               | 10.16                                 | 56.5   | 3.00           |
| $\text{TiO}_2/\text{Sb}_2\text{S}_3/\text{SiO}_2/\text{P3HT}$ | 0.498               | 10.07                                 | 55.6   | 2.79           |

**Table S2** Photovoltaic performances of all  $\text{Sb}_2\text{S}_3$ -sensitized solar cells.

|                    | $V_{\text{OC}}$ (V) | $J_{\text{SC}}$ (mA/cm <sup>2</sup> ) | Fill Factor (%) | Efficiency (%) |
|--------------------|---------------------|---------------------------------------|-----------------|----------------|
| $\text{TiO}_2$ -1  | 0.487               | 6.34                                  | 50.5            | 1.56           |
| $\text{TiO}_2$ -2  | 0.478               | 7.22                                  | 49.8            | 1.72           |
| $\text{TiO}_2$ -3  | 0.488               | 7.86                                  | 52.2            | 2.00           |
| $\text{TiO}_2$ -4  | 0.473               | 8.34                                  | 51.2            | 2.02           |
| $\text{TiO}_2$ -5  | 0.462               | 9.47                                  | 51.5            | 2.25           |
| $\text{TiO}_2$ -6  | 0.472               | 8.80                                  | 54.5            | 2.26           |
| $\text{TiO}_2$ -7  | 0.487               | 9.00                                  | 52.0            | 2.28           |
| $\text{TiO}_2$ -8  | 0.490               | 9.55                                  | 51.2            | 2.40           |
| $\text{TiO}_2$ -9  | 0.446               | 10.93                                 | 50.3            | 2.45           |
| $\text{TiO}_2$ -10 | 0.424               | 11.27                                 | 56.4            | 2.70           |
| $\text{TiO}_2$ -11 | 0.504               | 10.27                                 | 52.3            | 2.70           |
| $\text{TiO}_2$ -12 | 0.434               | 11.36                                 | 56.4            | 2.79           |
| $\text{TiO}_2$ -13 | 0.512               | 9.81                                  | 58.1            | 2.92           |
| $\text{TiO}_2$ -14 | 0.446               | 10.41                                 | 64.2            | 2.98           |
| $\text{TiO}_2$ -15 | 0.523               | 10.16                                 | 56.5            | 3.00           |

|                                        |       |       |      |      |
|----------------------------------------|-------|-------|------|------|
| TiO <sub>2</sub> /SiO <sub>2</sub> -1  | 0.496 | 9.17  | 54.0 | 2.46 |
| TiO <sub>2</sub> /SiO <sub>2</sub> -2  | 0.519 | 8.93  | 54.5 | 2.53 |
| TiO <sub>2</sub> /SiO <sub>2</sub> -3  | 0.492 | 10.86 | 53.1 | 2.84 |
| TiO <sub>2</sub> /SiO <sub>2</sub> -4  | 0.461 | 11.29 | 56.3 | 2.93 |
| TiO <sub>2</sub> /SiO <sub>2</sub> -5  | 0.541 | 9.90  | 55.1 | 2.95 |
| TiO <sub>2</sub> /SiO <sub>2</sub> -6  | 0.470 | 10.88 | 60.8 | 3.11 |
| TiO <sub>2</sub> /SiO <sub>2</sub> -7  | 0.468 | 10.97 | 60.7 | 3.12 |
| TiO <sub>2</sub> /SiO <sub>2</sub> -8  | 0.559 | 9.26  | 61.7 | 3.19 |
| TiO <sub>2</sub> /SiO <sub>2</sub> -9  | 0.465 | 11.17 | 63.2 | 3.28 |
| TiO <sub>2</sub> /SiO <sub>2</sub> -10 | 0.546 | 10.24 | 60.1 | 3.36 |
| TiO <sub>2</sub> /SiO <sub>2</sub> -11 | 0.479 | 11.06 | 63.9 | 3.39 |
| TiO <sub>2</sub> /SiO <sub>2</sub> -12 | 0.526 | 11.99 | 54.5 | 3.44 |
| TiO <sub>2</sub> /SiO <sub>2</sub> -13 | 0.509 | 11.88 | 57.1 | 3.45 |
| TiO <sub>2</sub> /SiO <sub>2</sub> -14 | 0.551 | 10.34 | 66.1 | 3.77 |
| TiO <sub>2</sub> /SiO <sub>2</sub> -15 | 0.558 | 10.44 | 68.1 | 3.96 |
